# 1 **Population fraction of Parkinson's disease attributable to preventable risk** 2 **factors**

3  
4 Haydeh Payami\*<sup>1,2</sup>, Gwendolyn Cohen<sup>1,2</sup>, Charles F Murchison<sup>1,2,4</sup>, Timothy R Sampson<sup>2,3</sup>, David G  
5 Standaert<sup>1,2</sup>, Zachary D Wallen<sup>1</sup>

6  
7 <sup>1</sup> Department of Neurology, University of Alabama at Birmingham, Birmingham, AL, 35233, USA

8 <sup>2</sup> Aligning Science Across Parkinson's (ASAP) Collaborative Research Network, Chevy Chase, MD,  
9 20815, USA

10 <sup>3</sup> Department of Cell Biology, Emory University School of Medicine, Atlanta GA 30329, USA

11 <sup>4</sup> Department of Biostatistics, University of Alabama at Birmingham, Birmingham, AL, 35233, USA

12

13 \*Senior and Corresponding author: haydehpayami@uabmc.edu

14

## 15 **Abstract**

16 Parkinson's disease is the fastest growing neurologic disease with seemingly no means for prevention. Intrinsic  
17 risk factors (age, sex, genetics) are inescapable, but environmental factors are not. We studied population  
18 attributable fraction and estimated fraction of PD that could be reduced if modifiable risk factors were eliminated.  
19 Assessing several known risk factors simultaneously in one study, we demonstrate that all were operative and  
20 independent, underscoring etiological heterogeneity within a single population. We investigated repeated blows to  
21 head in sports or combat as a potential new risk factor, and found it was associated with two-fold increased risk of  
22 PD. Considering modifiable risk factors, 23% of PD cases in females were attributable to pesticides/herbicides  
23 exposure, and 30% of PD cases in males was attributable to pesticides/herbicides, Agent Orange/chemical  
24 warfare, and repeated blows to the head. Thus, one-in-three cases of PD in males, and one-in-four cases in  
25 females could have potentially been prevented.

26 Disability and death due to Parkinson's disease are rising faster than for any other neurological disease in  
27 the world.<sup>1</sup> In 2016, six million people had PD globally, which was double the number of cases reported  
28 in 1990.<sup>1,2</sup> By 2040, the prevalence is expected to triple to 17 million<sup>2</sup>. These prevalence rates may be  
29 underestimated due to lack of awareness of PD and limited access to health care in many populations. The  
30 economic burden of PD in 2017 was \$51.9 billion in US alone<sup>3</sup>. In 2022 The World Health Organization  
31 declared "A pressing need for effective preventive actions ... to slow the rising incidence of PD before  
32 the burden and costs of treatment overwhelm country health services"<sup>4</sup>.

33  
34 PD is an etiologically heterogenous syndrome that affects many systems and is progressively  
35 debilitating<sup>5,6</sup>. The earliest signs are often gastrointestinal and olfactory dysfunction, depression, and  
36 sleep disorder. Movement disorders, the cardinal signs required for diagnosis, appear after decades of  
37 prodromal disease and neurodegeneration. By the time of diagnosis, over 80% of dopaminergic cells are  
38 already destroyed. At later stages, many develop psychosis and dementia. There is currently no  
39 prevention and no treatment to stop neurodegeneration. All clinical trials for disease modifying treatments  
40 have failed partly because PD is heterogenous, subtypes are clinically indistinguishable, and biomarkers  
41 to select appropriate patient population for trials are lacking. PD is likely not a single disease, rather a  
42 syndrome with a range of causes, all converging to produce the phenotype we call PD<sup>5,7</sup>. Three to five  
43 percent of PD are caused by pathogenic mutations in any one of causal genes, which are rare, and have  
44 seemingly different functions, e.g., *SNCA*, *PRKN*, *LRRK2*, *PINK1*<sup>6</sup>. The vast majority of PD remains  
45 idiopathic, thought to be caused by environmental triggers interacting with intrinsic risk factors such as  
46 genetic susceptibility<sup>6,8</sup>.

47  
48 Currently, the most compelling weapon against the global rise in PD is elimination of risk factors<sup>9</sup>.  
49 Intrinsic risk factors, which are not readily amenable to prevention, include increasing age, the male sex,  
50 positive family history of PD, and genetic causes and susceptibility variants<sup>6,10-15</sup>. Among environmental  
51 factors, neurotoxicant exposure, especially pesticide and herbicides, has been robustly associated with  
52 increased risk of PD<sup>8,16-18</sup>. Head injury is also common prior to development of PD but its causal  
53 relationship is questionable<sup>19-22</sup>. Cigarette smoking and coffee drinking are associated with reduced risk of  
54 PD<sup>23,24</sup>, and their protective effects are independent and additive such that non-smokers and caffeine users  
55 have extremely low risks<sup>25,26</sup>.

56  
57 Here, we investigated several factors simultaneously in a single population. Doing so enabled us to  
58 compare their effects side-by-side, test inter-dependence and overlap among them, and assess the burden  
59 of disease due to modifiable risk factors. We investigated family history of PD, exposure to

60 pesticides/herbicides, Agent Orange (an herbicide used in the Vietnam war)/chemical warfare, mild or  
61 moderate traumatic brain injury (MTBI)/concussion, and repeated blows to the head in sports or military  
62 as a potential new risk factor. We addressed the following questions. (1) Are all risk factor operative in  
63 one population? If only one or few risk factors predominate in a population, that would be an opening to  
64 teasing out etiologic heterogeneity. (2) Do repetitive hits to the head that do not have an immediate  
65 clinical manifestation increase risk of PD? There is growing evidence linking repetitive hits to the head in  
66 collision sports to neurodegenerative disease later in life<sup>22,27</sup>. Prior PD studies have defined head injury as  
67 hospital-treated MTBI or concussion<sup>19-22</sup>. It is not known if repetitive hits to the head with no immediate  
68 signs of injury increase PD risk. (3) Are the risk factors independent of each other? The few studies that  
69 have addressed interdependence among protective and risk factors found them to be independent<sup>25,26,28</sup>,  
70 and suggested the risk factors mark etiological subtypes of PD<sup>28</sup>. (4) What percentage of PD could  
71 potentially be reduced if modifiable risk factors were eliminated? Population attributable fraction (PAF)  
72 is an epidemiological metric commonly used to estimate the fraction of disease that is attributed to a risk  
73 factor<sup>29,30</sup>. It has been applied widely to many disorders including dementia<sup>31</sup>, but not to PD. One study  
74 has calculated population attributable risk (PAR not PAF) for PD reporting that 54% of PD risk is  
75 explained by the combined effects of family history of PD, not smoking, and occupational exposure to  
76 lead, copper, and insecticides<sup>32</sup>. Here we calculate PAF, with intervention as the goal, for potentially  
77 modifiable risk factors. To our knowledge, this is the first study of PAF for PD.

78  
79 The study was conducted in Birmingham, Alabama, in the center of the Deep South of the United States.  
80 The Deep South is understudied. Little is known about epidemiology of PD in the Deep South except that  
81 in surveys of United States, the Deep South states were found to have high incidence of PD<sup>10</sup>, and high  
82 rates of mortality from PD<sup>33</sup>. We show that all risk factors including repeated blows to the head, but  
83 possibly not MTBI/concussion, are operative in this geographically and culturally defined population, the  
84 risk factors are independent, and some are actionable candidates for disease prevention, and plausible  
85 markers for disease subtyping to reduce heterogeneity in clinical trials.

## 86 87 **Results**

### 88 89 *Subject characteristics and PD features*

90  
91 Study included 808 persons with PD (PwP) and 415 neurologically healthy controls (NHC). Nearly all  
92 study participants were living in the Deep South and peripheral states and 77% of them were born in the  
93 Deep South. This relatively homogenous population, compared to metropolitan regions of the world,

94 provided a convenient sample to determine which features and risk factors are operative in a single  
95 population. All known features of PD that were tested were captured in this population with statistical  
96 significance (**Table 1**). Notably, among PwP, 63% were males ( $P < 1E-5$ ). Constipation was five-fold more  
97 prevalent in PwP than in NHC ( $P = 4E-25$ ). Twice as many PwP reported having lost >10 pounds in the  
98 prior year than NHC ( $P = 4E-7$ ). Ten percent of PwP vs. none of the NHC reported having had rapid eye  
99 movement sleep behavior disorder (RBD), a rare disorder that often leads to PD ( $P = 2E-6$ ). Recapitulating  
100 these features establishes robustness of the data.

101

### 102 *Risk factors*

103

104 We collected data and tested association of the following risk factors with PD simultaneously in a single  
105 study population of 808 PwP and 415 NHC: family history of PD, exposure to pesticides/herbicides,  
106 exposure to Agent Orange/warfare chemicals, and MTBI/concussion. We also investigated repeated  
107 blows to the head in sports or combat as a potential risk factor. The exact questions that were used to  
108 collect the data are shown in **Table 2**.

109

110 We detected a strong and robust association signal for every risk factor examined except  
111 MTBI/concussion. **Table 3** shows raw unadjusted odds ratios (OR), as if each risk factor was assessed  
112 individually, first for all subjects, and then stratified by sex. **Table 4** shows results of conditional analysis  
113 where we included all risk factors in one model and estimated adjusted OR and P values for each risk  
114 factor conditioned on all other risk factors including age. Sex could not be included in conditional  
115 analysis because of collinearity of male sex with repeated blows to the head (all male) and exposure to  
116 Agent Orange/warfare chemicals (all male except one female).

117

118 Family history of PD was three- to four-times more common in PwP than NHC and was highly  
119 significant and robust to sex-stratification (**Table 3**), adjustments in conditional analysis, and sex-  
120 stratified conditional analysis (**Table 4**).

121

122 Pesticide/herbicide exposure was associated with a robust two- to three-fold increased risk of PD, in all  
123 subjects, in both sexes (**Table 3**), and when adjusted for other risk factors (**Table 4**). Duration of  
124 exposure was also significantly longer, almost double, for PwP than NHC (**Table 3**).

125

126 Unadjusted result for MTBI/concussion was initially significant showing a two-fold increase in PD  
127 (**Table 3**). However, the signal weakened in sex-stratified data (**Table 3**) and was further reduced and lost

128 significance in conditional analysis (**Table 4**). Prior studies have questioned the causal relationship of  
129 MTBI/concussion with PD because it is possible that balance problems in prodromal PD may be causing  
130 falls and head injury (reverse causality). One study showed that association of MTBI/concussion with PD  
131 was limited to the events occurring within 10 years of PD diagnosis<sup>20</sup>. In our study also, excluding  
132 MTBI/concussion within 10 years of PD onset, had a notable effect on weakening the signal (**Table 3**).

133

134 The unadjusted results for Agent Orange/chemical warfare and repeated blows to the head are skewed.  
135 Note that (a) there is a sex differential in this study, caused initially by inevitable increased prevalence of  
136 PD in males, and exaggerated by preferential selection of spouses as controls, and (b) sex could not be  
137 included in the conditional models because of strong collinearity of male-sex with repeated blows to head  
138 and Agent Orange/chemical warfare. Hence, the sex-stratified analyses are critical for interpreting the  
139 results.

140

141 Repeated blows to the head was initially estimated as four-fold more common in PwP than NHC (**Table**  
142 **3**). However, repeated blows to the head was reported by males only, and in males, it was associated with  
143 two-fold increased risk and was significant both individually (**Table 3**) and after adjusting for other risk  
144 factors including MTBI/concussion (**Table 4**).

145

146 Exposure to Agent Orange/chemical warfare yielded an unadjusted eight-fold increased risk (**Table 3**).  
147 Only one female, who had PD, reported exposure to Agent Orange/chemical warfare, the rest of the  
148 exposed were males. In males, Agent Orange/chemical warfare yielded an unadjusted four-fold increased  
149 risk. Interestingly, Agent Orange/chemical warfare association gained strength in conditional analysis,  
150 yielding a 10-fold increase in all subjects, and six-fold increase in males (**Table 4**).

151

152 We conclude that family history, exposure to pesticides/herbicides, Agent Orange/chemical warfare (as  
153 seen predominantly in males), and repeated blows to the head (as seen only in males) are all operative in  
154 this population, and that they have distinct independent effects on PD risk. Demonstration of  
155 independence does not preclude possibility of interaction, for example, between a certain genetic locus  
156 (captured by family history) and a chemical compound (captured by pesticides/herbicides). It does  
157 however establish each risk factor as a significant contributor to risk, independent of other factors.

158

159 *PAF*

160

161 PAF is an epidemiological metric to assess public health impact of a risk factor. PAF incorporates the  
162 strength of the risk (OR) with prevalence of risk factor to provide an estimate for the percentage of  
163 disease that would be reduced if risk factor were eliminated. We calculated PAF for risk factors that are  
164 modifiable, in the appropriate groups i.e., pesticide/herbicide exposure in males and females, Agent  
165 Orange/chemical warfare in males, and repeated blows to head in males. In calculating PAF we used  
166 adjusted OR (from **Table 4**) that were conditioned on all risk factors including age, family history,  
167 MTBI/concussion, pesticide/herbicide exposure, Agent Orange/chemical warfare, and repeated blows to  
168 head, as applicable. Hence, all PAF estimates are adjusted PAFs. Adjusted PAF for pesticide/herbicide  
169 exposure was 23% [12%-33%] for females and 17% [7%-27%] for males. In addition, among males,  
170 adjusted PAF was 10% [0.3%-20%] for repeated blows to the head, and 6% [0.03%-12%] for Agent  
171 Orange/chemical warfare exposure.

172  
173 In women, only one modifiable risk factor was detected. In men, there were three. To assess fraction of  
174 disease in males that was attributed to all three risk factors, we calculated joint PAF for the combination  
175 of pesticide/herbicide exposure, Agent Orange/chemical warfare, and repeated blows to head. Joint PAF  
176 assumes that risk factors are independent. In conditional analysis (**Table 4**) we established that each risk  
177 factor has an independent effect on PD risk. To assess if there is interaction (e.g., synergism), we tested  
178 pairwise interaction for the three risk factors in males. There was no evidence for interaction in this  
179 dataset. The interaction P values were  $P=0.99$  for [pesticide/herbicide exposure\* Agent Orange/chemical  
180 warfare],  $P=0.99$  for [Agent Orange/chemical warfare\*repeated blows], and  $P=0.56$  for  
181 [pesticide/herbicide exposure\* repeated blows to head]. Having established independence and lack of  
182 interaction, we calculated joint PAF for Agent Orange, pesticide/herbicide exposure, and repeated blows  
183 to head in sports or military in males as 30% [7%-49%].

184

## 185 **Discussion**

186

### 187 **Summary**

188

189 We investigated multiple risk factors simultaneously in a single population and addressed four questions:  
190 (1) Are all major risk factor of PD operative in one population? We had hoped that if only one or few risk  
191 factors predominate in a population, that would be an opening to teasing out etiologic heterogeneity.  
192 Nearly all features and risk factors tested were associated with PD. Thus, the extensive heterogeneity of  
193 PD is encapsulated even in this relatively isolated population in the Deep South. (2) Do repetitive hits to  
194 the head that do not have an immediate clinical manifestation increase risk of PD? Repeated blows to the

195 head, which is common in collision sports and do not normally require medical care, was associated with  
196 two-fold increases risk of PD. (3) Are the risk factors independent of each other? Family history, toxicant  
197 exposure, and repeated blows to the head are independent risk factors with little overlap, which is  
198 consistent with a prior report<sup>28</sup>. (4) What percentage of PD could potentially be reduced if modifiable risk  
199 factors were eliminated? One in three cases of PD in males, and one in four cases in females were  
200 attributed to modifiable risk factors and could have potentially been prevented. Results have two broad  
201 implications. First is prevention. PD is a complex disease with both intrinsic (genetics, aging) and  
202 extrinsic (environmental, life-choices) risk factors. While intrinsic factors are unescapable, extrinsic  
203 triggers may be preventable, thereby averting the disease. PAF estimates suggest a substantial fraction of  
204 PD is potentially preventable. Second is potential markers for disease subtypes. Clinical trials for  
205 neuroprotective treatments have all failed, due in part to lack of biomarkers to distinguish subtypes of PD.  
206 That the risk factors for PD are independent indicates family history of PD, repeated blows to head, and  
207 pesticide/herbicide exposure tag etiologic subtypes of PD.

208

## 209 *PAF*

210

211 PAF bridges science and decision making. It provides an estimate of excess risk that could potentially be  
212 eliminated, a starting point for discussing intervention. For PAF to be meaningful, several requirements  
213 must be met. Intervention must be possible. To that point, we calculated PAF only for modifiable risk  
214 factors and not for age, family history, or sex. The term “attributable” has a causal interpretation. The risk  
215 factors selected for PAF in this study have been causally linked to PD<sup>34-36</sup>. There is probably variation in  
216 genetic susceptibility that make people more or less vulnerable to potential damage caused by toxicant  
217 exposure or head injury. The cause is technically gene\*environment interaction. However, for PAF, the  
218 environmental trigger meets the definition/assumption of causality. Another requirement for accurate  
219 estimation of PAF is no bias in the study design and data being valid and accurate. We assert the  
220 robustness of our data from the strict QC measures that were implemented, subject selection was  
221 sequential and from only one movement disorder clinic, methods were standardized, and the resulting  
222 data recapitulated every known feature and risk factor of PD with high statistical significance and  
223 reasonable effect size. ORs were adjusted for all risk factors in the study, and adjusted PAFs were  
224 calculated using the adjusted ORs. Since risk factors are not mutually exclusive (a farmer exposed to  
225 toxicants could also have played a collision sport and had repeated blows to the head) the overlaps were  
226 accounted for by correct calculation of joint PAF<sup>30,37</sup>, having first established independence and absence  
227 of interaction, and then using adjusted ORs that were conditioned on all other risk factors. Finally, the  
228 interpretation of PAF is dependent on how exactly the exposure was defined; to that end, we have

229 provided the exact questions that were asked to solicit the data in **Table 2**. In short, we believe we have  
230 met the assumptions of PAF, conducted a rigorous study, and results are robust, suggesting a substantial  
231 fraction of PD could have been prevented if these individuals had not been exposed to heavy uses of  
232 pesticide/herbicides or Agent Orange/chemical warfare and had avoided activities that caused repeated  
233 blows to the head. We note that this is the first attempt at estimating PAF for PD and point out that the  
234 PAF estimates will be population specific depending on the distribution and frequency of risk factors.

235

### 236 *Pesticides/herbicide*

237

238 Pesticides and herbicides are among the most robust risk factors for PD<sup>8,16-18</sup>. Some pesticide and  
239 herbicides are inherently neurotoxic<sup>38</sup>. For instance, particular insecticides have been designed and  
240 developed to target neuronal pathways that are shared between insects and animals. PAF estimates  
241 obtained here suggest that exposure to pesticides/herbicide accounted for 23% of PD cases among  
242 females and 17% among males. This is an underestimate because our calculations were based on self-  
243 reported exposures to heavy uses of pesticides/herbicides and did not include exposure through  
244 contaminated soil, water, and consuming contaminated fruits, vegetables, meat, and fish<sup>39-41</sup>. US allows  
245 use of 72 pesticides that are banned in EU, and their usage in US has stayed constant or increased in the  
246 past decade<sup>42</sup>. Pesticide levels in surface waters are higher in US than EU and China<sup>43</sup>. Given such a  
247 robust risk and prevalence, and the potential for disease prevention, it is prudent that steps be taken to  
248 regulate access to and limit exposure to these toxicants, both acutely and chronically.

249

250 Our study does not identify any one particular chemical that is directly associated with PD. In the US, few  
251 states document the use of pesticides and herbicides, with very few making such data publicly accessible.  
252 Thus, it is difficult to pinpoint the risk effect of one specific chemical, outside of few locations (such as  
253 California<sup>44</sup>). Mandatory and enforced registration of pesticide application would be a first step to better  
254 understand exactly which chemicals we are exposed to, at what dose, and for how long. We still depend  
255 on certain pesticides and herbicides for modern agriculture and human health. Pyrethroids, for example,  
256 are important tools to control mosquito populations for limiting malaria, West Nile and Dengue viruses<sup>38</sup>.  
257 However, for certain chemicals with robust evidence of long-term harm, such as paraquat that has been  
258 firmly linked to PD in both human and experimental settings<sup>5,38</sup>, complete bans, as done in other  
259 countries, should seriously be considered.

260

### 261 *Head injury*

262



263 The association of PD with repeated blows to the head that do not cause concussion or require medical  
264 care was a notable finding in this study. Prior PD studies defined head injury as MTBI that caused  
265 concussion or needed medical care. MTBI/concussion is often found to be more common among PwP,  
266 however, causality has been questionable<sup>19,20</sup>. Is it MTBI/concussion that increases risk of PD or is it  
267 impaired balance in prodromal PD that increases risk of falls and head injuries? MTBI/concussion was  
268 more common in PwP in our study as well, but it lost its effect and significance when adjusted for other  
269 risk factors. We also saw a weakening signal when we excluded MTB/concussion within 10 years prior to  
270 PD onset. MTBI/concussion was the only risk factor that did not retain its signal after adjusting for other  
271 risk factors, even when all injuries up to onset of PD were included. Repeated blows to the head,  
272 however, had a robust signal of association that withstood adjustment for all other risk factors including  
273 MTBI/concussion. The most common source of repeated blows to the head is collision sports. Studies  
274 have shown adverse consequences of collision sports (mainly American football and soccer) on brain  
275 health later in life<sup>22,27,45</sup>. It is well-publicized in the popular media that football players go on to suffer  
276 high rates of depression, mood and behavioral problems, cognitive loss, dementia, and chronic traumatic  
277 encephalopathy. Despite high-profile national coverage by media on the dangers, American football  
278 remains highly popular in the US. In our study population, only men reported having had repeated blows  
279 to the head as youths. The popularity of collision sports is not waning among boys and is rising among  
280 school age girls. It is therefore imperative to implement effective safety measures for football, soccer,  
281 and all collision sports.

282

### 283 ***Caveats, Limitations, Confounders***

284

285 Repeated blows to the head as a risk factor for PD needs to be tested and confirmed in other populations.  
286 PAF estimates will vary across populations depending on the prevalence of the risk factors.

287

288 The PAF estimates reported here were based on a population of older adults and their past experiences  
289 that may have put them at risk. They are not necessarily predictive of the future. For example, in this  
290 cohort of older Southerners, no female reported repeated blows to the head due to sports or military, and  
291 only one female (with PD) had been exposed to Agent Orange. In the 1900's when these women were  
292 young, women did not partake in collision sports or military, as they do now. The PAFs for future will  
293 change, for the better or worse, depending on the actions we take now to clean our environment and  
294 improve health and safety standards.

295

296 As noted in sections above, we incorporated guards against potential confounders in our study design and  
297 statistical analyses. Here, we address two other commonly cited potential confounders in epidemiological  
298 studies of PD: reverse causality, and risk aversion. MTBI/concussion, although it was eliminated  
299 statistically, is a good example of confounding by reverse causation. Difficulty with balance may be  
300 present in prodromal PD and cause falls resulting in head injury, hence the possibility of PD causing head  
301 injuries, not vice versa. Reverse causality is not likely for repeated blows to head because they occur  
302 many decades prior to onset of PD, in children and young adults who partake in collision sports or  
303 military. Risk aversion, noted to be a premorbid personality trait<sup>46</sup>, complicates interpretation of negative  
304 associations such as smoking with PD. For example, while nicotine is known to be neuroprotective, it is  
305 still unclear if smoking is protective against PD or individuals who will eventually develop PD are averse  
306 to smoking due to its associated risks. This argument does not apply equally to risk factors as it does to  
307 protective factors. If anything, risk averse individuals would avoid collision sports, military, and toxicant  
308 exposure. Thus, if risk avoidance is a confounder for association of PD with repeated blows to the head,  
309 or with toxicant exposure, their true effect sizes could be larger than our estimates.

310

### 311 *Disease subtypes*

312

313 PD is a heterogenous syndrome with more than one cause<sup>5,6</sup>. Currently, the subtypes within idiopathic  
314 PD are indistinguishable. Disease heterogeneity, and unavailability of biomarkers to distinguish disease  
315 subtypes, is considered the main reason that clinical trials for disease modifying PD drugs fail. It has  
316 been proposed that the major risk factors for PD, that are independent of each other in their association  
317 with PD, represent markers for etiological subtypes<sup>28</sup>. Our study was set in the Deep South, which is a  
318 culturally unique and relatively isolated and stable population in the US. Over 95% of Subjects in this  
319 study live in the Deep South and 77% of them were born here. The relative uniformity in this population  
320 compared to more cosmopolitan regions of the world provided a desirable setting to test all risk factors  
321 simultaneously, in search of population-specific risk factors. We found all risk factors and features of PD  
322 robustly associated with PD in our study population. Our results indicate risk heterogeneity is present, to  
323 full extent, within even a relatively homogenous population.

324

325 Extensive efforts and cost are being spent in search of molecular biomarkers of disease subtypes in blood,  
326 cerebral spinal fluid, and microbiome. In a breakthrough, alpha-synuclein seed amplification assay (SAA)  
327 was recently described as a diagnostic biomarker in symptomatic PD and some high-risk populations<sup>47</sup>.  
328 SAA's detection power varies by genetics and clinical features, which underscores the etiological  
329 heterogeneity of PD, although SAA does not distinguish disease subtypes. Currently, the only markers

330 that can distinguish some PD subtypes are the highly penetrant pathogenic mutation in a causal gene  
331 (*SNCA*, *PRKN*, *LRRK2*, etc.), which are rare. For common idiopathic PD, there is currently no clear way  
332 to define and divide the subtypes<sup>48</sup>. As efforts for molecular biomarker discovery progress, we propose a  
333 simple, crude but potentially powerful alternative for the meantime. Here, we demonstrated that repeated  
334 blows to the head, exposure to pesticides/herbicides, and having a family history of PD are each an  
335 independent risk factor for PD. They all precede PD. Each is a biologically plausible cause. Their  
336 independence suggests they could represent markers for different etiological subtypes of PD. Belvisi et  
337 al.<sup>28</sup> also found family history of PD and exposure to pesticides (and metals and anesthesia) to be  
338 independent risk factors, and surmised that they mark etiological subtypes of PD. We agree. To that end,  
339 we propose that taking a brief history – as simple as the questions in **Table 2** - could help gauge and  
340 potentially reduce heterogeneity in clinical trials and improve odds of success.

341

## 342 **Methods**

343

### 344 *Enrollment of Study participants*

345

346 We have complied with all relevant ethical regulations. The study was approved by the Institutional  
347 Review Board (IRB) for Protection of Human subjects at the University of Alabama at Birmingham  
348 (UAB) and by the Office of Human Research Oversight (OHRO) of United States Department of Defense  
349 (DoD, funding agency). All subjects signed informed consent. No compensation was provided for  
350 participating in the study.

351

352 We enrolled 981 persons with PD (PwP) and 485 neurologically healthy controls (NHC). Inclusion  
353 criteria for PwP were diagnosis of PD by a movement disorder specialist neurologist at UAB according to  
354 UK Brain Bank criteria<sup>49</sup>, and informed consent. PwP were enrolled sequentially as they were seen at  
355 clinic. Controls consisted of patients' spouses and community volunteers. Inclusion criteria for controls  
356 were informed consent and self-report of not having PD, stroke, ataxia, multiple sclerosis, Alzheimer's  
357 disease, dementia, dystonia, autism, bipolar disorder, amyotrophic lateral sclerosis, or epilepsy (hence,  
358 neurologically healthy controls, NHC).

359

360 Enrolment occurred in two waves: July 2015-July 2017 (N=316 PwP and 181 NHC) and October 2018-  
361 March 2020 (N=665 PwP and 304 NHC). The sample size was determined by the arrival of COVID19  
362 pandemic in the Deep South, when we stopped enrolling.

363

364 ***Data collection***

365

366 Subjects were asked to fill out two questionnaires. The Environmental and Family History Questionnaire  
367 (EFQ) was first developed 1994 for the NeuroGenetics Research Consortium (NGRC), and has been  
368 published for three decades<sup>12,50</sup>. The Gut Microbiome Questionnaire (GMQ, the source for gastrointestinal  
369 data) was developed in 2014 and has also been published<sup>50</sup>. Questionnaires were self-administered with  
370 no interference from research staff. In the first enrollment wave, subjects completed the questionnaires in  
371 the clinic. In the second wave, subjects took the questionnaires home, and 74% of PwP (N=492) and 77%  
372 of NHC (N=234) completed and returned them. The final analytic sample size with completed  
373 questionnaires was 808 PwP and 415 NHC (**Table 1**).

374

375 Questions that were asked to collect the data used in this analysis are shown in **Table 2**. Positive family  
376 history was defined as having at least one first- or second-degree relative with PD; negative family history  
377 was absence of PD in first- and second-degree relatives; and indication of family history without  
378 specifying the degree was classified as unknown<sup>12,50</sup>. MTBI/concussions events (N=19) and exposures to  
379 pesticides/herbicides (N=5) which occurred in the same year or after onset of PD were not counted as  
380 events. When limiting MTBI/concussions to incidences that occurred more than 10 years prior to PD  
381 onset, the incidences within 10 years were treated as no event.

382

383 ***Quality control***

384

385 QC checkpoints were implemented at every step possible during data collection, data entry and data  
386 analysis. Briefly, questionnaires were reviewed at arrival for inconsistency across forms, missing data,  
387 and potential mix-up at home of case-control couples. Issues were resolved by contacting the subjects or  
388 reviewing medical records, otherwise the datapoint was excluded from analysis. All data (100%) were  
389 entered in computer twice, once in a Progeny database (**Supplementary Material/Software**), and once in  
390 Microsoft Excel, then downloaded and compared, data entry errors identified and corrected. Progeny was  
391 used as the main database. When subjects provided a non-standard answer (e.g., “teenager” instead of  
392 specifying age), standard rules were created and applied uniformly to all such answers for all subjects (ex.  
393 teenager=16). When in doubt, data were recorded as “Unknown” and made distinct from “No”. Statistical  
394 analyses were conducted by different analysts independently, one using manual calculation and one using  
395 a code and software pipeline, and were cross-checked for accuracy. Here, we present the results obtained  
396 via pipeline and the accompanying code.

397

398 *Statistics*

399  
400 The number of subjects with data for each item can be extracted from the **Supplementary Material/Data**  
401 and are also given for each test in the Tables. For software, the URLs and version used are given in  
402 **Supplementary Material/Software**. The code for data analysis is available on Zenodo [link will be  
403 provided in peer reviewed paper].

404  
405 Differences in frequencies of features (constipation, RBD, weight loss) in PwP vs. NHC were tested using  
406 Yates continuity-corrected OR, using the function `'Prop.or'` from the `pairwiseCI` R package specifying  
407 `"CImethod='Woolf'`.

408  
409 Association between risk factors and disease was tested under the null hypothesis of no difference and the  
410 alternative hypothesis that risk factor is associated with increased risk. There was no reason to think or  
411 test if they may be associated with reduced risk of PD, because these risk factors were chosen specifically  
412 because they have been robustly associated with increased PD risk in other populations. Given that the  
413 alternative hypothesis was one-sided (positive direction), tests were conducted one-sided. To test each  
414 risk factor individually, OR, lower bound (LB) of 95% confidence intervals (CI), and one-sided P values  
415 were calculated with no covariate adjustment from logistic regression models using `'glm'` in R. To assess  
416 strength and significance of each risk factor in the presence of, and adjusted for, other risk factors we used  
417 conditional analysis, where we included all relevant risk factors in the regression model, as shown in  
418 equations (EQ) (1)-(3):

419  
420 EQ (1) PD/Control ~ [age, family history, MTBI/concussion, repeated blows to head in sports or  
421 military, pesticide/herbicide exposure, Agent Orange/chemical warfare]

422 EQ (2) PD/Control | Male ~ [age, family history, MTBI/concussion, repeated blows to head in sports or  
423 military, pesticide/herbicide exposure, Agent Orange/chemical warfare]

424 EQ (3) PD/Control | Female ~ [age, family history, MTBI/concussion, pesticide/herbicide exposure]

425  
426 Sex was not included in conditional models due to its collinearity with repeated blows to head, and Agent  
427 Orange/chemical warfare. One-sided P value was calculated using `'glm'` specifying `'family="binomial"`  
428 in R. Adjusted odds ratio was calculated using equation `'exp(x)'` in R where x is a vector of coefficients  
429 extracted from `'glm'` in R. The lower-bound for the one-sided 95% CI were calculated by taking the lower  
430 bound of a two-sided 90% Wald CI, using `'exp(confint.default(x, level=0.9))'` in R where x is a `'glm'`

431 object from running the conditional models, and level=0.9 specifies the two-sided 90% interval. Analyses  
432 were repeated for males and females separately.

433

434 Population attributable fraction was calculated using Miettinen formula<sup>29</sup>:

435

$$436 \text{ EQ (4) } PAF = p_c (1 - 1/RR)$$

437

438 Where  $p_c$  is prevalence of risk factor in cases and RR is relative risk approximated by OR under the rare  
439 disease assumption. To adjust PAF for potential confounding, we used adjusted OR values derived from  
440 conditional analysis<sup>30</sup>. For the 95% CI, we used the function `AFglm` from the AF R package on the  
441 regression models, specifying `case.control=TRUE`, using a sandwich estimator for the variance of  
442 PAF<sup>37</sup>.

443

444 To assess the fraction of disease attributed to multiple risk factors, we calculated joint PAF (also known  
445 as summary PAF)<sup>30</sup>. Prior to calculating joint PAF, in order to meet the assumption of independence and  
446 absence of moderating synergy, we tested for pair-wise interaction between the three risk factors  
447 associated with PD in males. We used EQ (2) and added an interaction term, as follows:

448

449 EQ (5) PD/Control | male ~ [age, family history, MTBI/concussion, repeated blows to head in sports or  
450 military, pesticide/herbicide exposure, Agent Orange/chemical warfare, Agent Orange/chemical  
451 warfare\*repeated blows to head in sports or military]

452 EQ (6) PD/Control | male ~ [age, family history, MTBI/concussion, repeated blows to head in sports or  
453 military, pesticide/herbicide exposure, Agent Orange/chemical warfare, Agent Orange/chemical  
454 warfare\*pesticide/herbicide exposure]

455 EQ (7) PD/Control | male ~ [age, family history, MTBI/concussion, repeated blows to head in sports or  
456 military, pesticide/herbicide exposure, Agent Orange/chemical warfare, repeated blows to head in  
457 sports or military\*pesticide/herbicide exposure]

458

459 Having established independence and no interaction, we used EQ (8)<sup>30</sup> to calculate joint PAF

460

$$461 \text{ EQ(8) } PAF_{\text{Joint}} | \text{ Males} = 1 - \prod_i (1 - PAF_i)$$

$$462 PAF_{\text{Joint}} | \text{ Males} = 1 - [(1 - PAF_{\text{Agent Orange/chemical warfare}}) * (1 - PAF_{\text{repeated blows to head}}) * (1 - PAF_{\text{pesticide/herbicide}})]$$

463

464 The upper and lower bounds of 95% CI of joint PAF were calculated using EQ (8) with the set of three  
465 upper bounds and three lower bounds of the individual adjusted PAFs.

466

#### 467 **Data availability**

468

469 Data will be publicly available without restriction upon peer reviewed publication. The entire dataset at  
470 individual level, de-identified, will be provided in **Supplementary Material/Data**. As per Human  
471 Subject Research Privacy considerations, any subject over age 90 years will be denoted as 90 in publicly  
472 shared data although true age was used in this analysis. For software used, the URLs and software  
473 versions are given in **Supplementary Material/Software**. The code for reproducing the results can be  
474 found on Zenodo [link will be provided in peer reviewed paper].

475

#### 476 **Acknowledgements**

477

478 We thank research volunteers for participating in the study. Funding for data collection was provided by a  
479 grant from The U.S. Army Medical Research Materiel Command endorsed by the U.S. Army through the  
480 Parkinson's Research Program Investigator-Initiated Research Award under Award No.  
481 W81XWH1810508 to Haydeh Payami. Time and effort spent on this project were funded by grants from  
482 Aligning Science Across Parkinson's [ASAP-020527] through the Michael J. Fox Foundation for  
483 Parkinson's Research (MJFF) to Haydeh Payami, NIH/NIEHS 1R01ES032440 to Timothy Sampson, and  
484 NIH/NINDS P50 NS108675 to David Standaert. For the purpose of open access, the authors have applied  
485 a CC-BY public copyright license to all Author Accepted Manuscripts arising from this submission. The  
486 funding agencies had no role in writing of the manuscript or the decision to submit the paper for  
487 publication. Opinions, interpretations, conclusions, and recommendations are those of the authors and are  
488 not necessarily endorsed by the funding agencies.

489

#### 490 **Competing interests**

491

492 All authors declare no financial or non-financial competing interests.

493

#### 494 **Author contribution**

495

496 HP conceptualized and designed the study, and oversaw data collection, quality control, and statistical  
497 analysis. DGS provided clinic access for patient recruitment and took responsibility for clinical aspects of

498 study. HP, GC and ZDW directly accessed and verified the underlying data. HP, GC, CFM, ZDW  
499 processed and analyzed the data. TRS provided expertise on toxicants. HP and TRS wrote the first draft  
500 of the manuscript, and all authors reviewed, edited, and approved the final version of the manuscript.

501

## 502 **References**

503

- 504 1 Collaborators, G. B. D. P. s. D. Global, regional, and national burden of Parkinson's disease,  
505 1990-2016: a systematic analysis for the Global Burden of Disease Study 2016. *Lancet Neurol*  
506 **17**, 939-953 (2018). [https://doi.org/10.1016/S1474-4422\(18\)30295-3](https://doi.org/10.1016/S1474-4422(18)30295-3)
- 507 2 Dorsey, E. R., Sherer, T., Okun, M. S. & Bloem, B. R. The Emerging Evidence of the Parkinson  
508 Pandemic. *J Parkinsons Dis* **8**, S3-S8 (2018). <https://doi.org/10.3233/JPD-181474>
- 509 3 Yang, W. *et al.* Current and projected future economic burden of Parkinson's disease in the U.S.  
510 *NPJ Parkinsons Dis* **6**, 15 (2020). <https://doi.org/10.1038/s41531-020-0117-1>  
511 <https://www.who.int/publications/i/item/9789240050983>.
- 512 4 Obeso, J. A. *et al.* Past, present, and future of Parkinson's disease: A special essay on the 200th  
513 Anniversary of the Shaking Palsy. *Mov Disord* **32**, 1264-1310 (2017).  
514 <https://doi.org/10.1002/mds.27115>
- 515 6 Bloem, B. R., Okun, M. S. & Klein, C. Parkinson's disease. *Lancet* **397**, 2284-2303 (2021).  
516 [https://doi.org/10.1016/S0140-6736\(21\)00218-X](https://doi.org/10.1016/S0140-6736(21)00218-X)
- 517 7 Hardy, J. Genetic analysis of pathways to Parkinson disease. *Neuron* **68**, 201-206 (2010).  
518 <https://doi.org/10.1016/j.neuron.2010.10.014>
- 519 8 Cannon, J. R. & Greenamyre, J. T. Gene-environment interactions in Parkinson's disease: specific  
520 evidence in humans and mammalian models. *Neurobiol Dis* **57**, 38-46 (2013).  
521 <https://doi.org/10.1016/j.nbd.2012.06.025>
- 522 9 De Miranda, B. R., Goldman, S. M., Miller, G. W., Greenamyre, J. T. & Dorsey, E. R. Preventing  
523 Parkinson's Disease: An Environmental Agenda. *J Parkinsons Dis* **12**, 45-68 (2022).  
524 <https://doi.org/10.3233/JPD-212922>
- 525 10 Willis, A. W. *et al.* Incidence of Parkinson disease in North America. *NPJ Parkinsons Dis* **8**, 170  
526 (2022). <https://doi.org/10.1038/s41531-022-00410-y>
- 527 11 Hirsch, L., Jette, N., Frolkis, A., Steeves, T. & Pringsheim, T. The Incidence of Parkinson's  
528 Disease: A Systematic Review and Meta-Analysis. *Neuroepidemiology* **46**, 292-300 (2016).  
529 <https://doi.org/10.1159/000445751>



- 530 12 Payami, H., Larsen, K., Bernard, S. & Nutt, J. Increased risk of Parkinson's disease in parents and  
531 siblings of patients. *Ann Neurol* **36**, 659-661 (1994).
- 532 13 Thacker, E. L. & Ascherio, A. Familial aggregation of Parkinson's disease: A meta-analysis. *Mov*  
533 *Disord* **23**, 1174-1183 (2008).
- 534 14 Klein, C. & Westenberger, A. Genetics of Parkinson's disease. *Cold Spring Harb Perspect Med* **2**,  
535 a008888 (2012). [https://doi.org:10.1101/cshperspect.a008888](https://doi.org/10.1101/cshperspect.a008888)
- 536 15 Nalls, M. A. *et al.* Identification of novel risk loci, causal insights, and heritable risk for  
537 Parkinson's disease: a meta-analysis of genome-wide association studies. *Lancet Neurol* **18**, 1091-  
538 1102 (2019). [https://doi.org:10.1016/S1474-4422\(19\)30320-5](https://doi.org/10.1016/S1474-4422(19)30320-5)
- 539 16 Wang, A. *et al.* Parkinson's disease risk from ambient exposure to pesticides. *Eur J Epidemiol* **26**,  
540 547-555 (2011).
- 541 17 Ascherio, A. *et al.* Pesticide exposure and risk for Parkinson's disease. *Ann Neurol* **60**, 197-203  
542 (2006).
- 543 18 Perrin, L. *et al.* Pesticides expenditures by farming type and incidence of Parkinson disease in  
544 farmers: A French nationwide study. *Environ Res* **197**, 111161 (2021).  
545 [https://doi.org:10.1016/j.envres.2021.111161](https://doi.org/10.1016/j.envres.2021.111161)
- 546 19 Marras, C. *et al.* Systematic review of the risk of Parkinson's disease after mild traumatic brain  
547 injury: results of the International Collaboration on Mild Traumatic Brain Injury Prognosis. *Arch*  
548 *Phys Med Rehabil* **95**, S238-244 (2014). [https://doi.org:10.1016/j.apmr.2013.08.298](https://doi.org/10.1016/j.apmr.2013.08.298)
- 549 20 Rugbjerg, K., Ritz, B., Korbo, L., Martinussen, N. & Olsen, J. H. Risk of Parkinson's disease  
550 after hospital contact for head injury: population based case-control study. *BMJ* **337**, a2494  
551 (2008). [https://doi.org:10.1136/bmj.a2494](https://doi.org/10.1136/bmj.a2494)
- 552 21 Camacho-Soto, A. *et al.* Traumatic brain injury in the prodromal period of Parkinson's disease: A  
553 large epidemiological study using medicare data. *Ann Neurol* **82**, 744-754 (2017).  
554 [https://doi.org:10.1002/ana.25074](https://doi.org/10.1002/ana.25074)
- 555 22 Mackay, D. F. *et al.* Neurodegenerative Disease Mortality among Former Professional Soccer  
556 Players. *N Engl J Med* **381**, 1801-1808 (2019). [https://doi.org:10.1056/NEJMoa1908483](https://doi.org/10.1056/NEJMoa1908483)
- 557 23 Bellou, V., Belbasis, L., Tzoulaki, I., Evangelou, E. & Ioannidis, J. P. Environmental risk factors  
558 and Parkinson's disease: An umbrella review of meta-analyses. *Parkinsonism Relat Disord* **23**, 1-  
559 9 (2016). [https://doi.org:10.1016/j.parkreldis.2015.12.008](https://doi.org/10.1016/j.parkreldis.2015.12.008)
- 560 24 Hernan, M. A., Takkouche, B., Caamano-Isorna, F. & Gestal-Otero, J. J. A meta-analysis of  
561 coffee drinking, cigarette smoking, and the risk of Parkinson's disease. *Ann Neurol* **52**, 276-284  
562 (2002).

- 563 25 Powers, K. *et al.* Combined effects of smoking, coffee and NSAIDs on Parkinson's disease risk.  
564 *Mov Disord* **23**, 88-95 (2008).
- 565 26 Kim, I. Y. *et al.* Integration of risk factors for Parkinson disease in 2 large longitudinal cohorts.  
566 *Neurology* **90**, e1646-e1653 (2018). <https://doi.org/10.1212/WNL.0000000000005473>
- 567 27 Canseco, J. A. *et al.* Overview of Traumatic Brain Injury in American Football Athletes. *Clin J*  
568 *Sport Med* **32**, 236-247 (2022). <https://doi.org/10.1097/JSM.0000000000000918>
- 569 28 Belvisi, D. *et al.* Risk factors of Parkinson disease: Simultaneous assessment, interactions, and  
570 etiologic subtypes. *Neurology* **95**, e2500-e2508 (2020).  
571 <https://doi.org/10.1212/WNL.0000000000010813>
- 572 29 Miettinen, O. S. Proportion of the disease caused or prevented by a given exposure, trait or  
573 prevention. *Am J Epidemiol* **99**, 325-332 (1974).
- 574 30 Khosravi, A. & Mansournia, M. A. Methodological issues estimating population attributable  
575 fraction related to 'Health care cost of overweight-related diseases in Bangladesh'. *Public Health*  
576 *Nutr* **24**, 4195 (2021). <https://doi.org/10.1017/S1368980020003225>
- 577 31 Mukadam, N., Sommerlad, A., Huntley, J. & Livingston, G. Population attributable fractions for  
578 risk factors for dementia in low-income and middle-income countries: an analysis using cross-  
579 sectional survey data. *Lancet Glob Health* **7**, e596-e603 (2019). [https://doi.org/10.1016/S2214-109X\(19\)30074-9](https://doi.org/10.1016/S2214-109X(19)30074-9)
- 580
- 581 32 Gorell, J. M., Peterson, E. L., Rybicki, B. A. & Johnson, C. C. Multiple risk factors for  
582 Parkinson's disease. *J Neurol Sci* **217**, 169-174 (2004). <https://doi.org/10.1016/j.jns.2003.09.014>  
583 <https://www.cdc.gov/nchs/>.
- 584 34 Delic, V., Beck, K. D., Pang, K. C. H. & Citron, B. A. Biological links between traumatic brain  
585 injury and Parkinson's disease. *Acta Neuropathol Commun* **8**, 45 (2020).  
586 <https://doi.org/10.1186/s40478-020-00924-7>
- 587 35 McKnight, S. & Hack, N. Toxin-Induced Parkinsonism. *Neurol Clin* **38**, 853-865 (2020).  
588 <https://doi.org/10.1016/j.ncl.2020.08.003>
- 589 36 Gardner, R. C. *et al.* Mild TBI and risk of Parkinson disease: A Chronic Effects of Neurotrauma  
590 Consortium Study. *Neurology* **90**, e1771-e1779 (2018).  
591 <https://doi.org/10.1212/WNL.0000000000005522>
- 592 37 Dahlgvist, E., Zetterqvist, J., Pawitan, Y. & Sjolander, A. Model-based estimation of the  
593 attributable fraction for cross-sectional, case-control and cohort studies using the R package AF.  
594 *Eur J Epidemiol* **31**, 575-582 (2016). <https://doi.org/10.1007/s10654-016-0137-7>
- 595 38 Richardson, J. R., Fitsanakis, V., Westerink, R. H. S. & Kanthasamy, A. G. Neurotoxicity of  
596 pesticides. *Acta Neuropathol* **138**, 343-362 (2019). <https://doi.org/10.1007/s00401-019-02033-9>

- 597 39 James, K. A. & Hall, D. A. Groundwater pesticide levels and the association with Parkinson  
598 disease. *Int J Toxicol* **34**, 266-273 (2015). [https://doi.org:10.1177/1091581815583561](https://doi.org/10.1177/1091581815583561)
- 599 40 El-Nahhal, I. & El-Nahhal, Y. Pesticide residues in drinking water, their potential risk to human  
600 health and removal options. *J Environ Manage* **299**, 113611 (2021).  
601 [https://doi.org:10.1016/j.jenvman.2021.113611](https://doi.org/10.1016/j.jenvman.2021.113611)
- 602 41 Craddock, H. A., Huang, D., Turner, P. C., Quiros-Alcala, L. & Payne-Sturges, D. C. Trends in  
603 neonicotinoid pesticide residues in food and water in the United States, 1999-2015. *Environ*  
604 *Health* **18**, 7 (2019). [https://doi.org:10.1186/s12940-018-0441-7](https://doi.org/10.1186/s12940-018-0441-7)
- 605 42 Donley, N. The USA lags behind other agricultural nations in banning harmful pesticides.  
606 *Environ Health* **18**, 44 (2019). [https://doi.org:10.1186/s12940-019-0488-0](https://doi.org/10.1186/s12940-019-0488-0)
- 607 43 Fang, W., Peng, Y., Muir, D., Lin, J. & Zhang, X. A critical review of synthetic chemicals in  
608 surface waters of the US, the EU and China. *Environ Int* **131**, 104994 (2019).  
609 [https://doi.org:10.1016/j.envint.2019.104994](https://doi.org/10.1016/j.envint.2019.104994)
- 610 44 Ritz, B. R., Paul, K. C. & Bronstein, J. M. Of Pesticides and Men: a California Story of Genes  
611 and Environment in Parkinson's Disease. *Curr Environ Health Rep* **3**, 40-52 (2016).  
612 [https://doi.org:10.1007/s40572-016-0083-2](https://doi.org/10.1007/s40572-016-0083-2)
- 613 45 Mez, J. *et al.* Clinicopathological Evaluation of Chronic Traumatic Encephalopathy in Players of  
614 American Football. *JAMA* **318**, 360-370 (2017). [https://doi.org:10.1001/jama.2017.8334](https://doi.org/10.1001/jama.2017.8334)
- 615 46 Paulson, G. W. & Dadmehr, N. Is there a premorbid personality typical for Parkinson's disease?  
616 *Neurology* **42**, 77-80 (1991).
- 617 47 Siderowf, A. *et al.* Assessment of heterogeneity among participants in the Parkinson's  
618 Progression Markers Initiative cohort using alpha-synuclein seed amplification: a cross-sectional  
619 study. *Lancet Neurol* **22**, 407-417 (2023). [https://doi.org:10.1016/S1474-4422\(23\)00109-6](https://doi.org/10.1016/S1474-4422(23)00109-6)
- 620 48 Fereshtehnejad, S. M., Zeighami, Y., Dagher, A. & Postuma, R. B. Clinical criteria for subtyping  
621 Parkinson's disease: biomarkers and longitudinal progression. *Brain* **140**, 1959-1976 (2017).  
622 [https://doi.org:10.1093/brain/awx118](https://doi.org/10.1093/brain/awx118)
- 623 49 Gibb, W. R. G. & Lee, A. J. A comparison of clinical and pathological features of young- and  
624 old-onset Parkinson disease. *Neurology* **38** (1988).
- 625 50 Wallen, Z. D. *et al.* Metagenomics of Parkinson's disease implicates the gut microbiome in  
626 multiple disease mechanisms. *Nat Commun* **13**, 6958 (2022). [https://doi.org:10.1038/s41467-022-](https://doi.org/10.1038/s41467-022-34667-x)  
627 [34667-x](https://doi.org/10.1038/s41467-022-34667-x)
- 628
- 629

630 **Table 1. Enrollment, subject characteristics, and features of PD.**

631

| Subject Characteristics   | PD          |                    | NHC         |                    | PD features      |       |
|---------------------------|-------------|--------------------|-------------|--------------------|------------------|-------|
|                           | N with data | Summary statistics | N with data | Summary statistics | OR[95%CI]        | P     |
| Sample size               | 808         | -                  | 415         | -                  | -                | -     |
| Age                       | 808         | 68.3±8.7           | 415         | 66.1±8.6           | -                | -     |
| PD age at onset           | 808         | 59.3±11.0          | -           | -                  | -                | -     |
| Jewish ancestry           | 597         | 16 (3%)            | 313         | 9 (3%)             | -                | -     |
| Black or African American | 804         | 20 (2%)            | 410         | 6 (1%)             | -                | -     |
| Hispanic or Latino        | 787         | 13 (2%)            | 403         | 3 (0.7%)           | -                | -     |
| White                     | 804         | 772 (96%)          | 410         | 398 (97%)          | -                | -     |
| Residents of Deep South   | 799         | 764 (96%)          | 403         | 376 (93%)          | -                | -     |
| Residents of DS Periphery | 799         | 32 (4%)            | 403         | 26 (6%)            | -                | -     |
| <b>PD Features</b>        |             |                    |             |                    |                  |       |
| Sex (N & % male)          | 808         | 512 (63%)          | 415         | 125 (30%)          | -                | <1E-5 |
| Constipation              | 775         | 345 (45%)          | 402         | 57 (14%)           | 4.8 [3.5-6.7]    | 4E-25 |
| RBD                       | 479         | 47 (10%)           | 229         | 0 (0%)             | 50.4 [3.1-821.5] | 2E-6  |
| Weight loss               | 790         | 212 (27%)          | 406         | 56 (14%)           | 2.3 [1.7-3.1]    | 4E-7  |

632  
633 A total of 1466 individuals were enrolled, of whom 1223 completed the questionnaires and were used in the present  
634 study, including 808 persons with PD and 415 neurologically healthy controls (NHC). Characteristics are shown  
635 with the number of individuals for whom specified data were available and analyzed (N with data). Summary  
636 statistics is the mean and standard deviation for quantitative traits, and the number of individuals and % of total who  
637 are positive for the characteristic for dichotomous traits. Deep South (DS) includes the states of Alabama,  
638 Mississippi, Georgia, South Carolina, and Louisiana. DS periphery states are Texas, Tennessee, North Carolina, and  
639 Florida. Question on REM sleep behavior disorder (RBD) was added at the start of the second wave of data  
640 collection and was not asked of 316 PD and 181 NHC of the first wave. To assess robustness of data, features that  
641 are known to be more prevalent in PD were tested. Preponderance of male sex among PD was tested as proportion  
642 of persons with PD who were male (63%) vs. expected for null hypothesis of no sex difference (50%), using Z test  
643 (one proportion test) and showing the significance (P). Constipation, RBD and wight loss were tested comparing PD  
644 to NHC, using odds ratio (OR), 95% confidence interval (CI) of OR, and significance (P) denoting the difference  
645 between PD and NHC.

646 **Table 2. Questions used to collect the data**

| Question                                                                                                                                                                | Response options                                                                                                                                                                                                                                                                                       |
|-------------------------------------------------------------------------------------------------------------------------------------------------------------------------|--------------------------------------------------------------------------------------------------------------------------------------------------------------------------------------------------------------------------------------------------------------------------------------------------------|
| Sex                                                                                                                                                                     | <input type="checkbox"/> M <input type="checkbox"/> F                                                                                                                                                                                                                                                  |
| Today's date ( <i>as subject is completing form</i> )                                                                                                                   | _____                                                                                                                                                                                                                                                                                                  |
| Date of birth                                                                                                                                                           | _____                                                                                                                                                                                                                                                                                                  |
| Do you have Parkinson's disease?                                                                                                                                        | <input type="checkbox"/> No <input type="checkbox"/> Yes                                                                                                                                                                                                                                               |
| How old were you when you first noticed a sign of Parkinson's disease (age at onset)?                                                                                   | _____ years old                                                                                                                                                                                                                                                                                        |
| Do you have rapid eye movement sleep behavior disorder (RBD)?                                                                                                           | <input type="checkbox"/> No <input type="checkbox"/> Yes                                                                                                                                                                                                                                               |
| Have you had a stroke, ataxia, multiple sclerosis, Alzheimer's disease, dementia, dystonia, autism, bipolar disorder, amyotrophic lateral sclerosis (ALS), or epilepsy? | <input type="checkbox"/> No <input type="checkbox"/> Yes                                                                                                                                                                                                                                               |
| Are you often constipated (fewer than 3 bowel movements per week occurring frequently)?                                                                                 | <input type="checkbox"/> No <input type="checkbox"/> Yes                                                                                                                                                                                                                                               |
| Have you lost more than 10 pounds in the last year?                                                                                                                     | <input type="checkbox"/> No <input type="checkbox"/> Yes                                                                                                                                                                                                                                               |
| Have you had a head injury that caused loss of consciousness or required medical care?                                                                                  | <input type="checkbox"/> No <input type="checkbox"/> Yes                                                                                                                                                                                                                                               |
| If yes, how old were you when it first happened                                                                                                                         | _____ years old                                                                                                                                                                                                                                                                                        |
| Did you have repeated blows to the head such as in sports or military?                                                                                                  | <input type="checkbox"/> No <input type="checkbox"/> Yes                                                                                                                                                                                                                                               |
| Were you ever exposed to Agent Orange or other chemical warfare?                                                                                                        | <input type="checkbox"/> No <input type="checkbox"/> Yes <input type="checkbox"/> Don't know                                                                                                                                                                                                           |
| Were you ever exposed to heavy uses of pesticides or herbicides, for example, did you live on or near farms that did crop dusting?                                      | <input type="checkbox"/> No <input type="checkbox"/> Yes                                                                                                                                                                                                                                               |
| If yes, how old were you (give the range, for example, from birth until age 16)                                                                                         | _____                                                                                                                                                                                                                                                                                                  |
| Are you Hispanic or Latino?                                                                                                                                             | <input type="checkbox"/> No <input type="checkbox"/> Yes                                                                                                                                                                                                                                               |
| What race do you most identify yourself with?                                                                                                                           | <input type="checkbox"/> White<br><input type="checkbox"/> Black or African American<br><input type="checkbox"/> American Indian/Alaskan Native<br><input type="checkbox"/> Asian<br><input type="checkbox"/> Native Hawaiian or other Pacific Islander<br><input type="checkbox"/> More than one race |
| Are you of Jewish ancestry?                                                                                                                                             | <input type="checkbox"/> No <input type="checkbox"/> Yes                                                                                                                                                                                                                                               |
| Do you have any blood relatives who have Parkinson's disease (including your parents, grand-parents, siblings, aunts, and uncles)?                                      | <input type="checkbox"/> No <input type="checkbox"/> Yes                                                                                                                                                                                                                                               |
| If yes, for each relative who has or had PD, list their relationship to you                                                                                             | _____                                                                                                                                                                                                                                                                                                  |

648 Age was calculated by subtracting date of birth from today's date. Positive family history was defined as having at  
649 least one first or second degree relative with PD. Question on having PD was mainly for QC purposes; PD diagnosis  
650 was made by one of our movement disorder specialist neurologists at University of Alabama at Birmingham.  
651 Question on neurological diseases (stroke, ataxia, etc.) was the exclusion criteria for controls. The questions on  
652 repeated blows to the head, exposure to heavy uses of pesticide/herbicide, and Agent Orange/chemical warfare were  
653 added midway in the first wave of data collection. The question on RBD, and duration of exposure to  
654 pesticides/herbicides were added at the start of second wave. The numbers of subjects for each question or  
655 combinations can be extracted from the dataset which is provided in supplement.

656 **Table 3. Assessing association of risk factors with PD in a single population**

657

|                                               | N with data |     | Summary statistic |          | PD vs. NHC    |       |
|-----------------------------------------------|-------------|-----|-------------------|----------|---------------|-------|
|                                               | PD          | NHC | PD                | NHC      | OR [95%CI LB] | P     |
| <b>ALL SUBJECTS</b>                           |             |     |                   |          |               |       |
| Age                                           | 808         | 415 | 68.3±8.7          | 66.1±8.6 | 1.03 [1.02]   | 2E-05 |
| Family history of PD                          | 751         | 403 | 245 (33%)         | 59 (15%) | 2.82 [2.17]   | 6E-11 |
| MTBI/concussion                               | 777         | 410 | 157 (20%)         | 45 (11%) | 2.05 [1.52]   | 4E-05 |
| MTBI/concussion >10 years prior to PD onset   | 777         | 410 | 134 (17%)         | 45 (11%) | 1.69 [1.25]   | 2E-03 |
| Repeated blows to head in sports or military  | 571         | 290 | 76 (13%)          | 10 (3%)  | 4.3 [2.44]    | 1E-05 |
| Pesticide/herbicide exposure                  | 594         | 314 | 188 (32%)         | 45 (14%) | 2.77 [2.05]   | 1E-08 |
| Pesticide/herbicide exposure duration (years) | 436         | 224 | 5.5±13.6          | 2.9±10.6 | 1.02 [1.01]   | 9E-03 |
| Agent Orange/chemical warfare exposure        | 597         | 314 | 28 (5%)           | 2 (1%)   | 7.68 [2.29]   | 3E-03 |
| <b>Males</b>                                  |             |     |                   |          |               |       |
| Age                                           | 512         | 125 | 68.8±8.6          | 68.2±9.2 | 1.01 [0.99]   | 0.22  |
| Family history of PD                          | 480         | 121 | 145 (30%)         | 11 (9%)  | 4.33 [2.51]   | 5E-06 |
| MTBI/concussion                               | 493         | 124 | 112 (23%)         | 20 (16%) | 1.53 [0.99]   | 0.06  |
| MTBI/concussion >10 years prior to PD onset   | 493         | 124 | 97 (20%)          | 20 (16%) | 1.27 [0.82]   | 0.18  |
| Repeated blows to head in sports or military  | 356         | 95  | 76 (21%)          | 10 (11%) | 2.31 [1.28]   | 0.01  |
| Pesticide/herbicide exposure                  | 375         | 100 | 112 (30%)         | 15 (15%) | 2.41 [1.47]   | 2E-03 |
| Pesticide/herbicide exposure duration (years) | 275         | 65  | 5.2±13.7          | 3.1±10.9 | 1.01 [0.99]   | 0.13  |
| Agent Orange/chemical warfare exposure        | 373         | 99  | 27 (7%)           | 2 (2%)   | 3.78 [1.12]   | 0.04  |
| <b>Females</b>                                |             |     |                   |          |               |       |
| Age                                           | 296         | 290 | 67.5±8.9          | 65.3±8.3 | 1.03 [1.01]   | 1E-03 |
| Family history of PD                          | 271         | 282 | 100 (37%)         | 48 (17%) | 2.85 [2.04]   | 1E-07 |
| MTBI/concussion                               | 284         | 286 | 45 (16%)          | 25 (9%)  | 1.97 [1.27]   | 5E-03 |
| MTBI/concussion >10 years prior to PD onset   | 284         | 286 | 37 (13%)          | 25 (9%)  | 1.56 [1.00]   | 0.05  |
| Repeated blows to head in sports or military  | 215         | 195 | 0 (0%)            | 0 (0%)   | -             | -     |
| Pesticide/herbicide exposure                  | 219         | 214 | 76 (35%)          | 30 (14%) | 3.26 [2.19]   | 6E-07 |
| Pesticide/herbicide exposure duration (years) | 161         | 159 | 5.9±13.3          | 2.8±10.5 | 1.02 [1.01]   | 0.02  |
| Agent Orange/chemical warfare exposure        | 224         | 215 | 1 (0.4%)          | 0 (0%)   | -             | -     |

658

659 Each risk factor was tested individually as if they were the only factor under investigation (OR are not adjusted for  
660 potential effect of other risk factors. See **Table 4** for adjusted OR). Total number of subjects (N with data) and the  
661 number and percentage of those who were positive for risk factor (summary statistics) are shown for PD and  
662 neurologically healthy control (NHC). PD vs. NHC were one-sided tests with null hypothesis of no difference and  
663 alternative hypothesis that risk factor is positively associated (increased) in PD. Odds ratio (OR) and the lower

664 bound (LB) of 95% confidence interval (CI) are shown. Upper bound of CI is infinity. OR is indicative of strength  
665 of association approximating fold-difference in prevalence of the risk factors in PD vs. NHC, and one-sided P is the  
666 statistical significance of association. Family history of PD: 1st or 2nd degree relative with PD. MTBI/concussion:  
667 mild traumatic brain injury that caused loss of consciousness or required medical care, analyzed first excluding all  
668 incidences occurring around or after the time of onset, and once excluding incidences that occurred within 10 years  
669 prior to PD onset. Agent orange: herbicide used in the Vietnam war.



670 **Table 4. PD Risk factors are independent of each other.**

671

| Conditional analysis model                                                                                                                                     | N<br>PD | N<br>NHC | Risk factors in model                        | Adjusted OR<br>[95%CI LB] | P     |
|----------------------------------------------------------------------------------------------------------------------------------------------------------------|---------|----------|----------------------------------------------|---------------------------|-------|
| <b>All subjects</b>                                                                                                                                            |         |          |                                              |                           |       |
| PD/Control ~ [age, family history, MTBI/concussion, repeated blows to head in sports or military, pesticide/herbicide exposure, Agent Orange/chemical warfare] | 471     | 272      | age                                          | 1.03 [1.02]               | 3E-04 |
|                                                                                                                                                                |         |          | family history                               | 2.87 [2.05]               | 1E-07 |
|                                                                                                                                                                |         |          | MTBI/concussion                              | 1.30 [0.89]               | 0.13  |
|                                                                                                                                                                |         |          | repeated blows to head in sports or military | 3.68 [2.00]               | 2E-04 |
|                                                                                                                                                                |         |          | pesticide/herbicide exposure                 | 2.20 [1.56]               | 8E-05 |
|                                                                                                                                                                |         |          | Agent Orange/chemical warfare                | 10.81 [1.97]              | 0.01  |
| <b>Males</b>                                                                                                                                                   |         |          |                                              |                           |       |
| PD/Control ~ [age, family history, MTBI/concussion, repeated blows to head in sports or military, pesticide/herbicide exposure, Agent Orange/chemical warfare] | 297     | 88       | age                                          | 1.02 [0.99]               | 0.10  |
|                                                                                                                                                                |         |          | family history                               | 4.84 [2.51]               | 4E-05 |
|                                                                                                                                                                |         |          | MTBI/concussion                              | 1.20 [0.68]               | 0.30  |
|                                                                                                                                                                |         |          | repeated blows to head in sports or military | 2.00 [1.04]               | 0.04  |
|                                                                                                                                                                |         |          | pesticide/herbicide exposure                 | 2.52 [1.37]               | 6E-03 |
|                                                                                                                                                                |         |          | Agent Orange/chemical warfare                | 6.03 [1.08]               | 0.04  |
| <b>Females</b>                                                                                                                                                 |         |          |                                              |                           |       |
| PD/Control ~ [age, family history, MTBI/concussion, pesticide/herbicide exposure]                                                                              | 193     | 206      | age                                          | 1.03 [1.01]               | 8E-03 |
|                                                                                                                                                                |         |          | family history                               | 2.62 [1.75]               | 4E-05 |
|                                                                                                                                                                |         |          | MTBI/concussion                              | 1.35 [0.79]               | 0.18  |
|                                                                                                                                                                |         |          | pesticide/herbicide exposure                 | 2.85 [1.87]               | 2E-05 |

672

673 Five risk factors (from **Table 3**) and age were included in one conditional analysis model and tested simultaneously  
674 for association with PD. N PD and N NHC are the numbers of persons with PD and neurologically healthy controls  
675 for whom we had data on all risk factors in the specified model. Sex was not included in the model because of  
676 collinearity (all repeated blows to head, and all except one exposure to Agent Orange/chemical warfare were males),  
677 instead, analyses were repeated for males and females separately. The tests were one-sided with null hypothesis of  
678 no difference and alternative hypothesis of risk factor is increased in PD. Results are shown for each risk factor as  
679 adjusted odds ratio (OR), lower bound (LB) of 95% confidence interval (CI), upper bound is infinity, and  
680 significance (one-sided P) of association with PD conditioned on the other risk factors in the model. Age, family  
681 history (1st or 2nd degree relative with PD), repeated blows to the head, pesticides/herbicide exposure, and Agent

682 Orange/chemical warfare retained their effect sizes and significance; they have distinct, independent signals. Mild  
683 traumatic brain injury (MTBI)/concussion lost significance.

684 **Table 5. Population attributable fraction (PAF) of preventable risk factors**

685

| Risk factor                                                                                       | Group   | PAF [95%CI]    | <i>Determinants of PAF</i> |                          |
|---------------------------------------------------------------------------------------------------|---------|----------------|----------------------------|--------------------------|
|                                                                                                   |         |                | <i>adjusted OR</i>         | <i>Prevalence in PwP</i> |
| <b>PAF for Individual risk factors</b>                                                            |         |                |                            |                          |
| Pesticide/herbicide exposure                                                                      | All     | 16% [9%-24%]   | 2.20                       | 30%                      |
| Pesticide/herbicide exposure                                                                      | Females | 23% [12%-34%]  | 2.85                       | 35%                      |
| Pesticide/herbicide exposure                                                                      | Males   | 17% [7%-27%]   | 2.52                       | 28%                      |
| Agent Orange/chemical warfare                                                                     | Males   | 6% [0.03%-12%] | 6.03                       | 7%                       |
| Repeated blows to head in sports or military                                                      | Males   | 10% [0.3%-20%] | 2.00                       | 20%                      |
| <b>Joint PAF for combination of risk factors</b>                                                  |         |                |                            |                          |
| Repeated blows to head in sports or military, pesticide/herbicide & Agent Orange/chemical warfare | Males   | 30% [7%-49%]   | -                          | 43%                      |

686

687 PAF is the fraction of disease that is attributed to one or combination of risk factors and is interpreted as the fraction  
 688 of disease that would be reduced if risk factor was eliminated. It is calculated using prevalence of risk factor in  
 689 patient population and relative risk (or odds ratio (OR) if disease is rare as is PD). PAF estimate for each risk factor  
 690 was adjusted for other risk factors, by using adjusted OR from **Table 4**.
